# Supplementary material
Source: PubMed Central journal article supplement (PMC1420368)
Supplement: pmed.0030047.st001.pdf [file pmed.0030047.st001.pdf]

# Supplemental Table S1

## Survival – Clinical Variable only

|                                     | Significance | Hazard Ratio<br>For Death | 95.0% CI for Hazard Ratio |       |
|-------------------------------------|--------------|---------------------------|---------------------------|-------|
|                                     |              |                           | Lower                     | Upper |
| Diameter T2 (> 2cm) vs. T1 (=< 2cm) | 0.041        | 1.653                     | 1.020                     | 2.679 |
| Lymph node positive vs. negative    | 0.407        | 1.342                     | 0.669                     | 2.694 |
| Grade III vs. II vs. I              | 0.022        | 1.865                     | 1.094                     | 3.180 |
| Age above 40 vs. 40 and below       | 0.031        | 0.583                     | 0.357                     | 0.951 |
| ER positive vs. negative            | 0.0004       | 0.408                     | 0.249                     | 0.671 |
| Angio invasion + vs.+/-, vs. -      | 0.002        | 1.458                     | 1.142                     | 1.860 |
| Chemotherapy Yes versus No          | 0.310        | 0.691                     | 0.338                     | 1.411 |
| Hormonal therapy Yes versus No      | 0.686        | 0.831                     | 0.338                     | 2.040 |

## Distant Metastasis as First Event – Clinical Variable only

|                                     | Significance | Hazard Ratio<br>For Metastasis | 95.0% CI for Hazard Ratio |       |
|-------------------------------------|--------------|--------------------------------|---------------------------|-------|
|                                     |              |                                | Lower                     | Upper |
| Diameter T2 (> 2cm) vs. T1 (=< 2cm) | 0.001        | 2.152                          | 1.360                     | 3.407 |
| Lymph node positive vs. negative    | 0.326        | 1.374                          | 0.728                     | 2.592 |
| Grade III vs. II vs. I              | 0.166        | 1.414                          | 0.866                     | 2.309 |
| Age above 40 vs. 40 and below       | 0.039        | 0.614                          | 0.386                     | 0.976 |
| ER positive vs. negative            | 0.123        | 0.669                          | 0.402                     | 1.115 |
| Angio invasion + vs.+/-, vs. -      | 0.003        | 1.419                          | 1.123                     | 1.795 |
| Chemotherapy Yes versus No          | 0.049        | 0.509                          | 0.260                     | 0.997 |
| Hormonal therapy Yes versus No      | 0.332        | 0.664                          | 0.291                     | 1.517 |
