# Supplementary material
Source: PubMed Central journal article supplement (PMC1420368)
Supplement: pmed.0030047.st002.pdf [file pmed.0030047.st002.pdf]

## Supplemental Table S2

### Survival – Clinical Variable, Hypoxia and 70-genes Prognosis Profile

|                                     | Significance | Hazard Ratio | 95.0% CI for Hazard Ratio |        |
|-------------------------------------|--------------|--------------|---------------------------|--------|
|                                     |              | For Death    | Lower                     | Upper  |
| Diameter T2 (> 2cm) vs. T1 (=< 2cm) | 0.026        | 1.733        | 1.069                     | 2.809  |
| Lymph node positive vs. negative    | 0.324        | 1.420        | 0.708                     | 2.846  |
| Grade III vs. II vs. I              | 0.963        | 1.013        | 0.582                     | 1.765  |
| Age above 40 vs. 40 and below       | 0.032        | 0.581        | 0.354                     | 0.954  |
| ER positive vs. negative            | 0.295        | 0.755        | 0.446                     | 1.277  |
| Angio invasion + vs.+/-, vs. -      | 0.014        | 1.362        | 1.064                     | 1.743  |
| Chemotherapy Yes versus No          | 0.174        | 0.603        | 0.291                     | 1.250  |
| Hormonal therapy Yes versus No      | 0.481        | 0.718        | 0.287                     | 1.801  |
| Hypoxia (Hypoxic vs Non-Hypoxic)    | 0.001        | 2.494        | 1.434                     | 4.336  |
| 70 genes (poor vs good)             | 0.0002       | 4.987        | 2.162                     | 11.507 |

### Distant Metastasis as First Event – Clinical Variable, Hypoxia and 70-genes Prognosis Profile

|                                     | Significance | Hazard Ratio | 95.0% CI for Hazard Ratio |       |
|-------------------------------------|--------------|--------------|---------------------------|-------|
|                                     |              | For Death    | Lower                     | Upper |
| Diameter T2 (> 2cm) vs. T1 (=< 2cm) | 0.001        | 2.190        | 1.383                     | 3.467 |
| Lymph node positive vs. negative    | 0.401        | 1.313        | 0.695                     | 2.479 |
| Grade III vs. II vs. I              | 0.453        | 0.822        | 0.494                     | 1.370 |
| Age above 40 vs. 40 and below       | 0.095        | 0.668        | 0.416                     | 1.073 |
| ER positive vs. negative            | 0.630        | 1.143        | 0.664                     | 1.967 |
| Angio invasion + vs.+/-, vs. -      | 0.024        | 1.318        | 1.037                     | 1.675 |
| Chemotherapy Yes versus No          | 0.034        | 0.479        | 0.242                     | 0.945 |
| Hormonal therapy Yes versus No      | 0.219        | 0.590        | 0.255                     | 1.367 |
| Hypoxia (Hypoxic vs Non-Hypoxic)    | 0.012        | 1.888        | 1.149                     | 3.102 |
| 70 genes (poor vs good)             | <0.0001      | 4.043        | 2.117                     | 7.721 |
