# Supplementary material
Source: PubMed Central journal article supplement (PMC1420368)

**Cox Model: Survival**

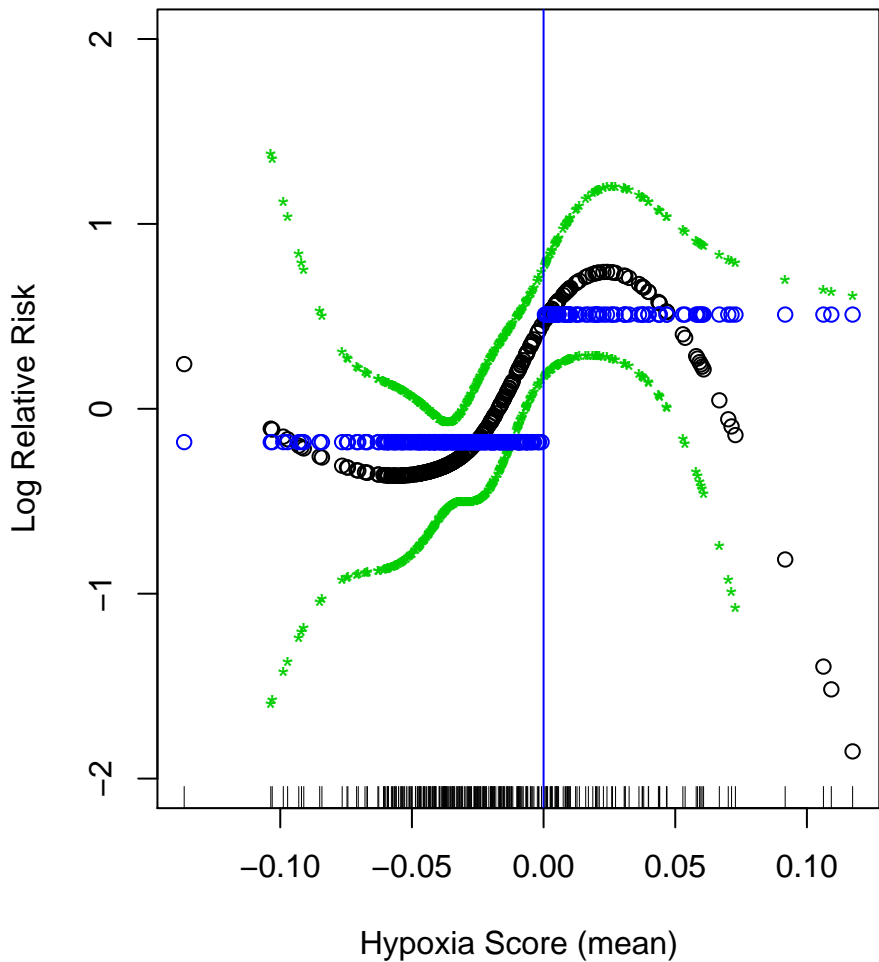

**Cox Model: Time to Recurrence**

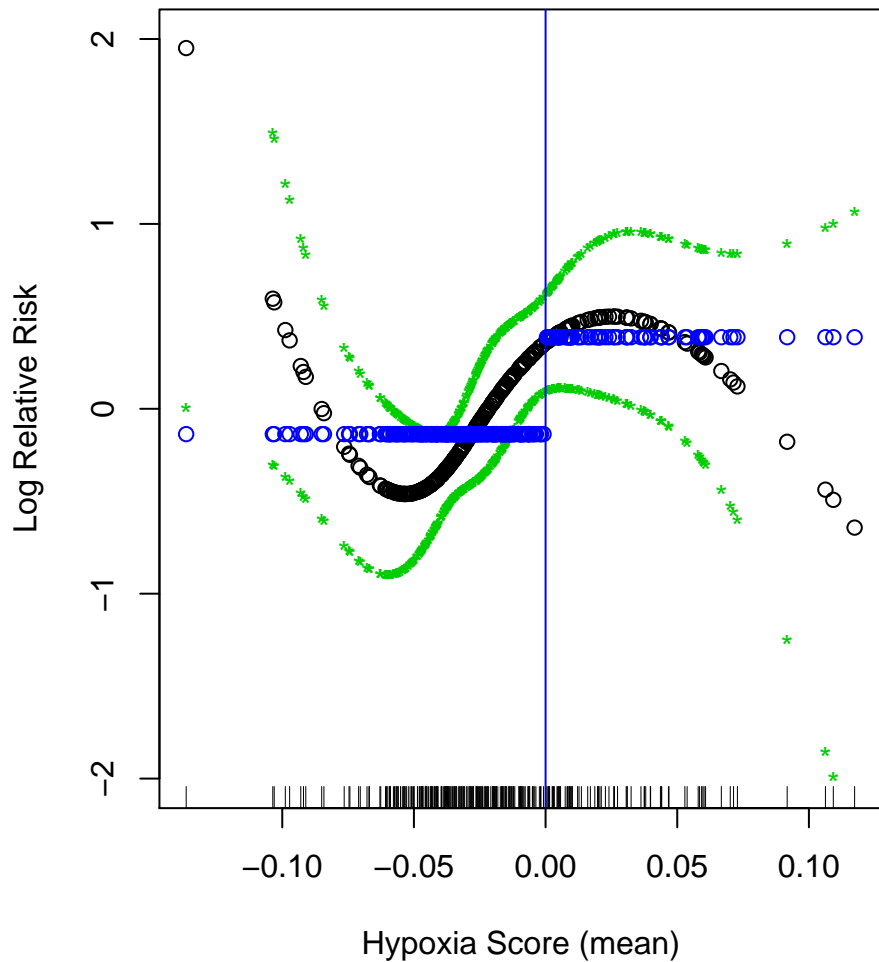

Supplement: pmed.0030047.sg001.pdf [file pmed.0030047.sg001.pdf]
